# Supplementary material for: Chemometric Classification of Colombian Cacao Crops: Effects of Different Genotypes and Origins in Different Years of Harvest on Levels of Flavonoid and Methylxanthine Metabolites in Raw Cacao Beans
Source: MDPI journal article supplement (doi:10.3390/molecules27072068), 2022-03-23
Supplement: s1 [file s1]

# Chemometric Classification of Colombian Cacao Crops: Effects of Different Genotypes and Origins in Different Years of Harvest on Levels of Flavonoid and Methylxanthine Metabolites in Raw Cacao Beans

Catalina Agudelo <sup>1</sup>, Susana Acevedo <sup>1</sup>, Luis Carrillo-Hormaza <sup>1,2</sup>, Elkin Galeano <sup>1</sup> and Edison Osorio <sup>1,\*</sup>

<sup>1</sup> Grupo de Investigación en Sustancias Bioactivas, Facultad de Ciencias Farmacéuticas y Alimentarias, Universidad de Antioquia, Calle 70 No. 52-21, 0500100 Medellín, Colombia; catalina.agudelo@udea.edu.co (C.A.); susana.munoz@udea.edu.co (S.A.); lcarrillo@bioingred.co (L.C.-H.); elkin.galeano@udea.edu.co (E.G.)

<sup>2</sup> Bioingred, Spin-Off Universidad de Antioquia, 055412 Itagüí, Colombia

\* Correspondence: edison.osorio@udea.edu.co; Tel./Fax: +574-219-6590

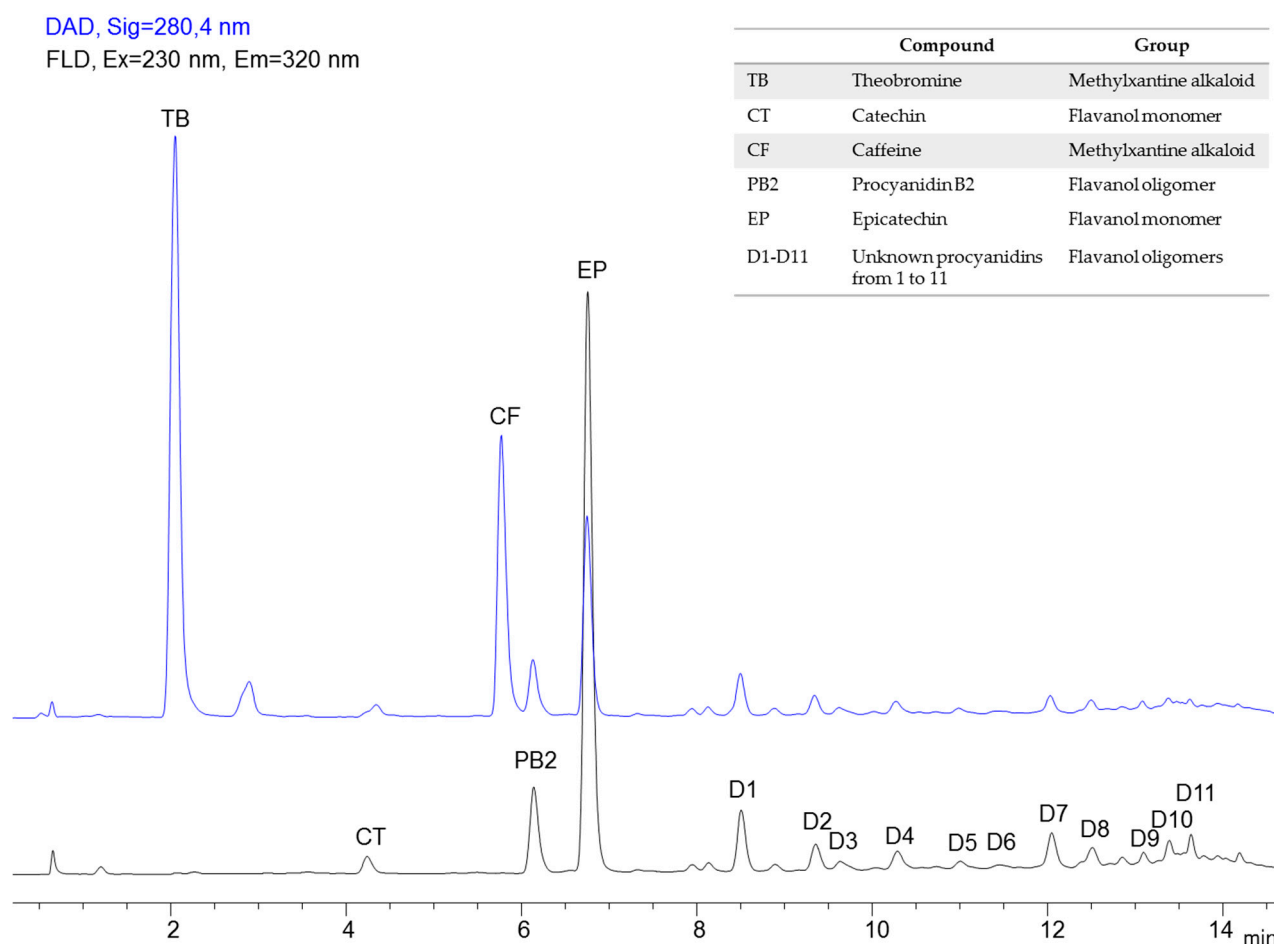

**Figure S1.** HPLC-DAD-FLD metabolic profile of quantified compounds in *Theobroma cacao* L. unfermented beans.

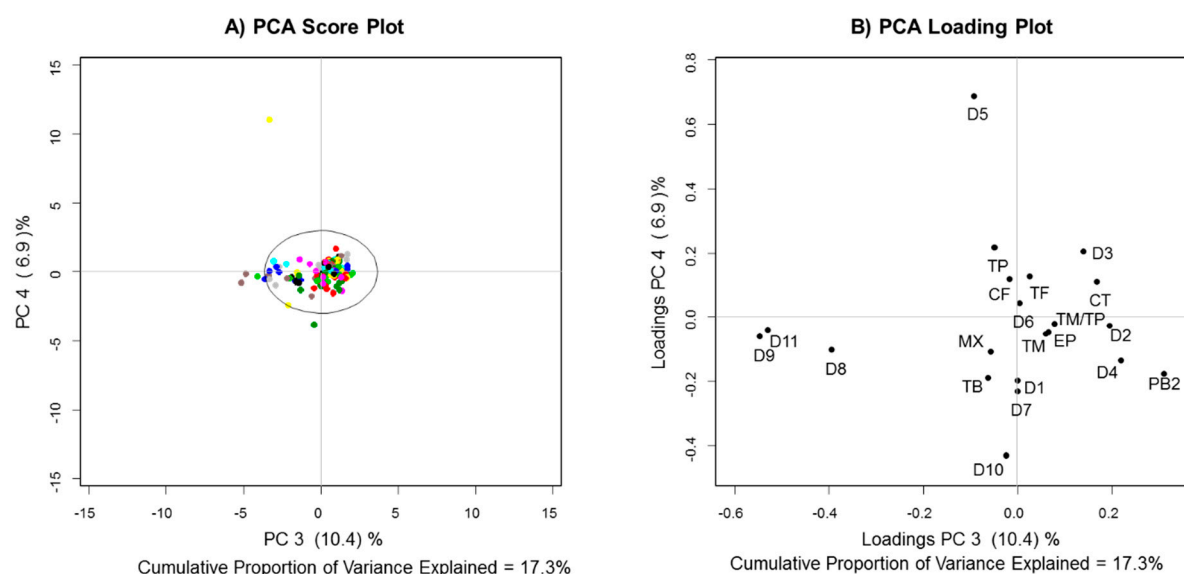

**Figure S2.** PCA plots with PC3 and PC4 principal components of flavanol monomers, flavanol oligomers and methylxanthine alkaloids in *Theobroma cacao* seeds. **A)** Score plot and **B)** loading plot. The color code is as follows: ICS-1, yellow; EET-96, dark blue; FEC-2, light green; TAME-2, dark green; FSV-41, red; CCN-51, black; ICS-95, fuchsia; TSH-565, aqua; FEAR-5, dark gray; and ICS-60, light gray. TM: total monomers; TP: total procyanidins; MX: total methylxanthines; TM/TP: monomer/procyanidin ratio; CT: catechin; EP: epicatechin; PB2: procyanidin B2; CF: caffeine; TB: theobromine; D1-11: unknown procyanidins 1-11; TF: total flavonoids.

The contribution ratios were 10.4% and 6.9% for PC3 and PC4, respectively. As seen from Figure S2A, the short distances between samples in the score plot indicates that there is no difference between the cocoa clones regarding the metabolites studied. FSV-41 and ISC-95 clones presented the least variability. Samples corresponded to FEAR-5, EET-96, ICS-60 and TSH-565 clones showed greater dispersion affected by the presence of metabolites D8, D9 and D11 (procyanidins) while TAME-2 clone showed dispersion affected by the content of methylxanthines (MX, TB) and D10 as shown in Figure S2B, loading plot of PCA that revealed the specific components that lead to the differences between samples.

Table S1. Samples and concentrations of individual markers.

| Sample   | TB    | CF   | CT   | PB2  | EP    | D1   | D2   | D3   | D4   | D5   | D6   | D7   | D8   | D9   | D10  | D11  | TM    | TP    | TM/TP | TF    | MX    |
|----------|-------|------|------|------|-------|------|------|------|------|------|------|------|------|------|------|------|-------|-------|-------|-------|-------|
|          | mg/g  |      |      |      |       |      |      |      |      |      |      |      |      |      |      |      |       |       |       |       |       |
| CCN 10   | 12.21 | 1.02 | 0.37 | 3.47 | 17.97 | 2.70 | 1.78 | 0.87 | 1.39 | 0.76 | 0.57 | 1.44 | 0.63 | 0.00 | 0.00 | 0.00 | 18.34 | 13.61 | 1.35  | 31.95 | 13.23 |
| CCN 13   | 12.84 | 0.63 | 0.35 | 3.38 | 16.89 | 2.71 | 1.81 | 0.90 | 1.43 | 0.80 | 0.62 | 1.51 | 0.67 | 0.00 | 0.00 | 0.00 | 17.24 | 13.83 | 1.25  | 31.07 | 12.84 |
| EET 8    | 13.99 | 1.29 | 0.50 | 2.88 | 16.65 | 2.10 | 1.30 | 0.63 | 1.01 | 0.58 | 0.00 | 1.18 | 0.55 | 0.00 | 0.00 | 0.00 | 17.15 | 10.23 | 1.68  | 27.38 | 15.28 |
| CCN 3    | 12.52 | 0.86 | 0.46 | 3.10 | 16.50 | 2.32 | 1.46 | 0.72 | 1.09 | 0.64 | 0.00 | 1.29 | 0.53 | 0.00 | 0.00 | 0.00 | 16.96 | 11.15 | 1.52  | 28.11 | 12.52 |
| TSH 7    | 13.76 | 2.70 | 0.39 | 2.98 | 16.03 | 2.28 | 1.48 | 0.73 | 1.05 | 0.63 | 0.00 | 1.30 | 0.52 | 0.00 | 0.00 | 0.00 | 16.42 | 10.97 | 1.50  | 27.39 | 16.46 |
| EET 11   | 14.04 | 1.37 | 0.44 | 2.91 | 15.90 | 2.15 | 1.37 | 0.69 | 0.95 | 0.61 | 0.00 | 1.20 | 0.53 | 0.00 | 0.00 | 0.00 | 16.34 | 10.41 | 1.57  | 26.75 | 15.41 |
| EET 2    | 9.57  | 1.50 | 0.45 | 2.50 | 15.40 | 1.79 | 0.99 | 0.54 | 0.77 | 0.00 | 0.00 | 1.06 | 0.54 | 0.00 | 0.00 | 0.00 | 15.85 | 8.19  | 1.94  | 24.04 | 11.07 |
| EET 4    | 9.55  | 0.97 | 0.38 | 2.79 | 14.54 | 2.01 | 1.28 | 0.00 | 0.99 | 0.00 | 0.00 | 1.13 | 0.00 | 0.00 | 0.00 | 0.00 | 14.92 | 8.20  | 1.82  | 23.12 | 9.55  |
| TSH 4    | 12.05 | 1.83 | 0.37 | 2.09 | 14.35 | 1.30 | 0.64 | 0.38 | 0.54 | 0.35 | 0.28 | 1.11 | 0.82 | 0.58 | 0.00 | 0.58 | 14.72 | 8.67  | 1.70  | 23.39 | 13.88 |
| TSH 3    | 7.80  | 1.07 | 0.23 | 2.59 | 14.45 | 1.82 | 1.06 | 0.52 | 0.80 | 0.00 | 0.00 | 1.06 | 0.61 | 0.00 | 0.00 | 0.00 | 14.68 | 8.46  | 1.74  | 23.14 | 8.86  |
| TSH 6    | 13.80 | 3.38 | 0.30 | 2.33 | 14.17 | 1.66 | 0.91 | 0.49 | 0.75 | 0.42 | 0.00 | 1.12 | 0.70 | 0.55 | 0.00 | 0.64 | 14.47 | 9.57  | 1.51  | 24.04 | 17.18 |
| EET 5    | 9.55  | 1.24 | 0.39 | 2.72 | 13.89 | 1.97 | 1.25 | 0.00 | 0.98 | 0.00 | 0.00 | 1.09 | 0.00 | 0.00 | 0.00 | 0.00 | 14.28 | 8.01  | 1.78  | 22.29 | 10.79 |
| TSH 8    | 12.24 | 1.49 | 0.29 | 2.36 | 13.78 | 1.67 | 0.95 | 0.52 | 0.73 | 0.44 | 0.34 | 1.15 | 0.59 | 0.52 | 0.00 | 0.53 | 14.07 | 9.80  | 1.44  | 23.87 | 13.73 |
| ICS95 2  | 11.20 | 1.99 | 0.34 | 2.36 | 13.59 | 0.00 | 0.00 | 0.00 | 0.00 | 0.00 | 0.00 | 0.00 | 0.00 | 0.00 | 0.00 | 0.00 | 13.93 | 2.36  | 5.90  | 16.29 | 13.19 |
| CCN 5    | 9.49  | 0.76 | 0.00 | 2.45 | 13.79 | 1.66 | 0.89 | 0.00 | 0.70 | 0.00 | 0.00 | 1.04 | 0.64 | 0.00 | 0.00 | 0.00 | 13.79 | 7.38  | 1.87  | 21.17 | 9.49  |
| ICS-60 1 | 11.09 | 1.56 | 0.36 | 2.50 | 13.41 | 0.00 | 1.28 | 0.72 | 1.00 | 0.59 | 0.00 | 1.13 | 0.00 | 0.00 | 0.00 | 0.00 | 13.77 | 7.22  | 1.91  | 20.99 | 12.65 |
| TSH 1    | 8.90  | 0.85 | 0.31 | 2.04 | 13.36 | 0.00 | 0.00 | 0.00 | 0.00 | 0.00 | 0.00 | 0.00 | 0.00 | 0.00 | 0.00 | 0.00 | 13.67 | 2.04  | 6.70  | 15.71 | 8.90  |
| TSH 2    | 6.44  | 0.78 | 0.30 | 2.17 | 13.17 | 0.00 | 0.00 | 0.00 | 0.00 | 0.00 | 0.00 | 0.00 | 0.00 | 0.00 | 0.00 | 0.00 | 13.47 | 2.17  | 6.21  | 15.64 | 6.44  |
| EET 9    | 10.02 | 1.08 | 0.34 | 2.50 | 13.12 | 1.86 | 1.15 | 0.58 | 0.89 | 0.00 | 0.00 | 1.01 | 0.48 | 0.00 | 0.00 | 0.00 | 13.46 | 8.47  | 1.59  | 21.93 | 11.10 |
| ICS95 1  | 10.83 | 1.47 | 0.30 | 2.12 | 13.02 | 0.00 | 0.00 | 0.00 | 0.00 | 0.00 | 0.00 | 0.00 | 0.00 | 0.00 | 0.00 | 0.00 | 13.32 | 2.12  | 6.28  | 15.44 | 12.29 |
| EET 10   | 10.20 | 0.99 | 0.29 | 2.57 | 13.01 | 1.98 | 1.24 | 0.62 | 0.94 | 0.00 | 0.00 | 1.04 | 0.00 | 0.00 | 0.00 | 0.00 | 13.30 | 8.39  | 1.59  | 21.69 | 10.20 |
| FEC 3    | 8.16  | 0.74 | 0.37 | 2.61 | 12.86 | 1.92 | 1.26 | 0.00 | 0.96 | 0.00 | 0.00 | 1.06 | 0.00 | 0.00 | 0.00 | 0.00 | 13.23 | 7.81  | 1.69  | 21.04 | 8.16  |
| ICS1 7   | 8.58  | 1.43 | 0.21 | 2.63 | 12.83 | 2.03 | 1.35 | 0.00 | 1.04 | 0.00 | 0.00 | 1.15 | 0.00 | 0.00 | 0.00 | 0.00 | 13.04 | 8.20  | 1.59  | 21.24 | 10.00 |
| ICS1 2   | 8.10  | 1.44 | 0.00 | 1.96 | 12.91 | 0.00 | 0.00 | 0.00 | 0.00 | 0.00 | 0.00 | 0.00 | 0.00 | 0.00 | 0.00 | 0.00 | 12.91 | 1.96  | 6.59  | 14.87 | 9.53  |
| ICS 60 3 | 11.12 | 1.58 | 0.26 | 2.10 | 12.27 | 1.43 | 0.74 | 0.40 | 0.54 | 0.00 | 0.00 | 0.81 | 0.65 | 0.49 | 0.00 | 0.52 | 12.53 | 7.68  | 1.63  | 20.21 | 12.70 |
| FEC 1    | 7.76  | 0.76 | 0.32 | 1.99 | 12.20 | 0.00 | 0.00 | 0.00 | 0.00 | 0.00 | 0.00 | 0.00 | 0.00 | 0.00 | 0.00 | 0.00 | 12.52 | 1.99  | 6.29  | 14.51 | 7.76  |
| FSV 2    | 10.48 | 1.37 | 0.24 | 1.92 | 12.28 | 1.19 | 0.59 | 0.00 | 0.46 | 0.00 | 0.00 | 0.89 | 0.65 | 0.00 | 0.00 | 0.00 | 12.52 | 5.70  | 2.20  | 18.22 | 11.85 |

|           |       |      |      |      |       |      |      |      |      |      |      |      |      |      |      |      |       |      |      |       |       |
|-----------|-------|------|------|------|-------|------|------|------|------|------|------|------|------|------|------|------|-------|------|------|-------|-------|
| CCN 11    | 10.32 | 0.67 | 0.25 | 2.48 | 12.21 | 1.91 | 1.24 | 0.66 | 0.96 | 0.58 | 0.00 | 1.12 | 0.48 | 0.00 | 0.00 | 0.00 | 12.46 | 9.43 | 1.32 | 21.89 | 10.32 |
| FTA 7     | 12.51 | 1.94 | 0.27 | 2.25 | 12.15 | 0.00 | 1.07 | 0.58 | 0.88 | 0.56 | 0.00 | 1.14 | 0.00 | 0.00 | 0.00 | 0.00 | 12.42 | 6.48 | 1.92 | 18.90 | 14.45 |
| EET 12    | 10.99 | 1.37 | 0.28 | 2.34 | 12.06 | 1.73 | 1.01 | 0.53 | 0.76 | 0.00 | 0.00 | 1.04 | 0.46 | 0.00 | 0.00 | 0.00 | 12.34 | 7.87 | 1.57 | 20.21 | 12.36 |
| FEAR 11   | 10.87 | 0.72 | 0.26 | 2.14 | 12.01 | 1.49 | 0.85 | 0.43 | 0.64 | 0.00 | 0.00 | 1.03 | 0.70 | 0.66 | 0.00 | 0.65 | 12.27 | 8.59 | 1.43 | 20.86 | 10.87 |
| EET 1     | 9.88  | 1.09 | 0.31 | 1.72 | 11.91 | 0.99 | 0.50 | 0.00 | 0.00 | 0.00 | 0.00 | 0.82 | 0.55 | 0.51 | 0.00 | 0.54 | 12.22 | 5.63 | 2.17 | 17.85 | 10.97 |
| FEC 4     | 7.00  | 0.53 | 0.35 | 2.38 | 11.87 | 1.85 | 1.23 | 0.00 | 0.95 | 0.00 | 0.00 | 1.06 | 0.00 | 0.00 | 0.00 | 0.00 | 12.22 | 7.47 | 1.64 | 19.69 | 7.00  |
| FTA 6     | 12.27 | 1.74 | 0.30 | 2.14 | 11.76 | 0.00 | 1.00 | 0.55 | 0.82 | 0.53 | 0.00 | 1.13 | 0.00 | 0.00 | 0.00 | 0.00 | 12.06 | 6.17 | 1.95 | 18.23 | 14.01 |
| ICS95 4   | 12.90 | 1.90 | 0.38 | 2.30 | 11.63 | 1.78 | 1.09 | 0.58 | 0.87 | 0.54 | 0.40 | 1.09 | 0.68 | 0.41 | 0.00 | 0.00 | 12.01 | 9.74 | 1.23 | 21.75 | 14.81 |
| TSH 5     | 7.25  | 0.80 | 0.20 | 2.26 | 11.68 | 1.63 | 0.98 | 0.50 | 0.74 | 0.00 | 0.00 | 0.88 | 0.52 | 0.00 | 0.00 | 0.00 | 11.88 | 7.51 | 1.58 | 19.39 | 7.25  |
| EET 6     | 11.41 | 1.60 | 0.28 | 1.88 | 11.50 | 1.46 | 0.64 | 0.00 | 0.55 | 0.00 | 0.00 | 1.01 | 0.62 | 0.50 | 0.00 | 0.00 | 11.78 | 6.66 | 1.77 | 18.44 | 13.01 |
| CCN 9     | 10.54 | 0.64 | 0.24 | 2.27 | 11.50 | 1.80 | 1.08 | 0.56 | 0.85 | 0.47 | 0.00 | 1.06 | 0.53 | 0.00 | 0.00 | 0.00 | 11.74 | 8.62 | 1.36 | 20.36 | 10.54 |
| ICS 60 4  | 13.39 | 0.31 | 0.30 | 2.00 | 11.40 | 1.43 | 0.80 | 0.00 | 0.64 | 0.00 | 0.00 | 0.93 | 0.66 | 0.50 | 0.00 | 0.50 | 11.70 | 7.46 | 1.57 | 19.16 | 13.39 |
| CCN 6     | 8.17  | 0.71 | 0.00 | 2.04 | 11.51 | 1.37 | 0.76 | 0.00 | 0.60 | 0.00 | 0.00 | 0.92 | 0.62 | 0.00 | 0.00 | 0.00 | 11.51 | 6.31 | 1.82 | 17.82 | 8.17  |
| FEC 2     | 8.54  | 0.41 | 0.33 | 1.86 | 11.15 | 0.00 | 0.00 | 0.00 | 0.00 | 0.00 | 0.00 | 0.00 | 0.00 | 0.00 | 0.00 | 0.00 | 11.48 | 1.86 | 6.17 | 13.34 | 8.54  |
| ICS60 2   | 10.85 | 1.15 | 0.28 | 2.24 | 11.17 | 0.00 | 1.24 | 0.71 | 1.01 | 0.59 | 0.00 | 1.00 | 0.00 | 0.00 | 0.00 | 0.00 | 11.45 | 6.79 | 1.69 | 18.24 | 12.00 |
| EET 7     | 11.22 | 1.36 | 0.25 | 1.89 | 11.20 | 1.28 | 0.70 | 0.00 | 0.53 | 0.00 | 0.00 | 0.94 | 0.55 | 0.45 | 0.00 | 0.45 | 11.45 | 6.79 | 1.69 | 18.24 | 12.58 |
| FEAR 6    | 8.39  | 0.65 | 0.24 | 2.04 | 10.93 | 1.45 | 0.84 | 0.45 | 0.64 | 0.00 | 0.00 | 0.91 | 0.00 | 0.00 | 0.00 | 0.00 | 11.17 | 6.33 | 1.76 | 17.50 | 8.39  |
| EET 3     | 9.30  | 1.08 | 0.28 | 1.62 | 10.87 | 0.98 | 0.60 | 0.00 | 0.49 | 0.00 | 0.00 | 0.78 | 0.54 | 0.50 | 0.00 | 0.51 | 11.15 | 6.02 | 1.85 | 17.17 | 10.38 |
| FSV 1     | 9.38  | 1.87 | 0.96 | 1.92 | 10.18 | 1.62 | 1.04 | 0.53 | 0.83 | 0.54 | 0.41 | 0.96 | 0.60 | 0.00 | 0.00 | 0.00 | 11.14 | 8.45 | 1.32 | 19.59 | 11.25 |
| CCN 2     | 8.39  | 0.63 | 0.30 | 1.80 | 10.74 | 0.00 | 0.00 | 0.00 | 0.00 | 0.00 | 0.00 | 0.00 | 0.00 | 0.00 | 0.00 | 0.00 | 11.04 | 1.80 | 6.13 | 12.84 | 8.39  |
| CCN 7     | 9.29  | 0.59 | 0.00 | 2.02 | 10.94 | 1.43 | 0.80 | 0.00 | 0.63 | 0.00 | 0.00 | 0.88 | 0.57 | 0.00 | 0.00 | 0.48 | 10.94 | 6.81 | 1.61 | 17.75 | 9.29  |
| FSV 9     | 7.99  | 1.38 | 0.32 | 2.14 | 10.48 | 1.61 | 1.07 | 0.00 | 0.84 | 0.00 | 0.00 | 0.94 | 0.00 | 0.00 | 0.00 | 0.00 | 10.80 | 6.60 | 1.64 | 17.40 | 9.37  |
| FSV 14    | 9.94  | 1.97 | 0.26 | 1.99 | 10.49 | 1.65 | 1.08 | 0.55 | 0.85 | 0.55 | 0.00 | 0.99 | 0.52 | 0.00 | 0.00 | 0.00 | 10.75 | 8.18 | 1.31 | 18.93 | 11.91 |
| ICS1 8    | 7.99  | 1.15 | 0.20 | 2.26 | 10.46 | 1.81 | 1.23 | 0.00 | 0.96 | 0.00 | 0.00 | 1.03 | 0.00 | 0.00 | 0.00 | 0.00 | 10.66 | 7.29 | 1.46 | 17.95 | 9.14  |
| CCN 1     | 9.54  | 0.50 | 0.28 | 1.70 | 10.31 | 0.00 | 0.00 | 0.00 | 0.00 | 0.00 | 0.00 | 0.00 | 0.00 | 0.00 | 0.00 | 0.00 | 10.59 | 1.70 | 6.23 | 12.29 | 9.54  |
| ICS1 1    | 6.55  | 1.12 | 0.00 | 1.54 | 10.48 | 0.00 | 0.00 | 0.00 | 0.00 | 0.00 | 0.00 | 0.00 | 0.00 | 0.00 | 0.00 | 0.00 | 10.48 | 1.54 | 6.81 | 12.02 | 7.66  |
| ICS 60 6  | 13.28 | 2.42 | 0.00 | 2.29 | 10.47 | 1.87 | 1.21 | 0.65 | 0.93 | 0.54 | 0.00 | 0.97 | 0.49 | 0.00 | 0.00 | 0.00 | 10.47 | 8.95 | 1.17 | 19.42 | 15.70 |
| ICS 60 5  | 11.75 | 0.32 | 0.25 | 1.80 | 10.14 | 1.26 | 0.70 | 0.00 | 0.56 | 0.00 | 0.00 | 0.82 | 0.57 | 0.52 | 0.00 | 0.52 | 10.39 | 6.75 | 1.54 | 17.14 | 11.75 |
| ICS1 6    | 7.92  | 0.97 | 0.21 | 1.86 | 10.09 | 1.33 | 0.77 | 0.41 | 0.59 | 0.00 | 0.00 | 0.87 | 0.53 | 0.00 | 0.00 | 0.00 | 10.30 | 6.36 | 1.62 | 16.66 | 7.92  |
| ICS 95 13 | 13.10 | 1.80 | 0.25 | 2.39 | 9.94  | 1.96 | 1.25 | 0.66 | 0.99 | 0.57 | 0.00 | 1.07 | 0.53 | 0.00 | 0.00 | 0.00 | 10.19 | 9.42 | 1.08 | 19.61 | 14.90 |
| FTA 3     | 8.91  | 0.75 | 0.25 | 1.63 | 9.90  | 0.00 | 0.00 | 0.00 | 0.00 | 0.00 | 0.00 | 0.00 | 0.00 | 0.00 | 0.00 | 0.00 | 10.15 | 1.63 | 6.23 | 11.78 | 8.91  |

|         |       |      |      |      |       |      |      |      |      |      |      |      |      |      |      |      |       |      |      |       |       |
|---------|-------|------|------|------|-------|------|------|------|------|------|------|------|------|------|------|------|-------|------|------|-------|-------|
| FEAR 2  | 7.87  | 0.53 | 0.25 | 1.72 | 9.88  | 0.00 | 0.00 | 0.00 | 0.00 | 0.00 | 0.00 | 0.00 | 0.00 | 0.00 | 0.00 | 0.00 | 10.13 | 1.72 | 5.89 | 11.85 | 7.87  |
| FEAR 1  | 6.61  | 0.50 | 0.30 | 1.65 | 9.81  | 0.00 | 0.00 | 0.00 | 0.00 | 0.00 | 0.00 | 0.00 | 0.00 | 0.00 | 0.00 | 0.00 | 10.11 | 1.65 | 6.13 | 11.76 | 6.61  |
| FEAR 3  | 8.01  | 0.68 | 0.00 | 1.37 | 10.04 | 0.79 | 0.00 | 0.00 | 0.00 | 0.00 | 0.00 | 0.72 | 0.62 | 0.50 | 0.00 | 0.49 | 10.04 | 4.49 | 2.24 | 14.53 | 8.01  |
| EET 14  | 11.42 | 1.94 | 0.23 | 1.83 | 9.79  | 1.36 | 0.81 | 0.42 | 0.66 | 0.00 | 0.00 | 0.91 | 0.51 | 0.48 | 0.00 | 0.54 | 10.02 | 7.52 | 1.33 | 17.54 | 13.36 |
| FTA 9   | 9.64  | 0.45 | 0.26 | 1.71 | 9.70  | 1.14 | 0.64 | 0.00 | 0.52 | 0.00 | 0.00 | 0.79 | 0.60 | 0.00 | 0.00 | 0.00 | 9.96  | 5.40 | 1.84 | 15.36 | 9.64  |
| ICS1 4  | 6.68  | 1.07 | 0.00 | 1.70 | 9.95  | 0.00 | 0.00 | 0.00 | 0.00 | 0.00 | 0.00 | 0.00 | 0.00 | 0.53 | 0.00 | 0.00 | 9.95  | 2.23 | 4.46 | 12.18 | 7.75  |
| FSV 3   | 8.58  | 0.99 | 0.24 | 1.63 | 9.69  | 1.21 | 0.69 | 0.00 | 0.47 | 0.00 | 0.00 | 0.83 | 0.45 | 0.00 | 0.00 | 0.00 | 9.93  | 5.28 | 1.88 | 15.21 | 8.58  |
| FEAR 4  | 5.74  | 0.54 | 0.00 | 1.32 | 9.88  | 0.73 | 0.00 | 0.00 | 0.00 | 0.00 | 0.00 | 0.77 | 0.61 | 0.51 | 0.00 | 0.49 | 9.88  | 4.43 | 2.23 | 14.31 | 5.74  |
| FTA 10  | 8.58  | 0.41 | 0.25 | 1.85 | 9.54  | 1.38 | 0.87 | 0.00 | 0.66 | 0.00 | 0.00 | 0.79 | 0.00 | 0.00 | 0.00 | 0.00 | 9.79  | 5.55 | 1.76 | 15.34 | 8.58  |
| FTA 4   | 8.24  | 0.52 | 0.26 | 1.59 | 9.48  | 0.00 | 0.00 | 0.00 | 0.00 | 0.00 | 0.00 | 0.00 | 0.00 | 0.00 | 0.00 | 0.00 | 9.74  | 1.59 | 6.13 | 11.33 | 8.24  |
| CCN 8   | 8.69  | 0.52 | 0.00 | 1.81 | 9.62  | 1.29 | 0.72 | 0.00 | 0.58 | 0.00 | 0.00 | 0.78 | 0.57 | 0.00 | 0.00 | 0.51 | 9.62  | 6.26 | 1.54 | 15.88 | 8.69  |
| ICS95 5 | 12.84 | 1.75 | 0.32 | 1.47 | 9.25  | 1.45 | 0.91 | 0.51 | 0.73 | 0.48 | 0.38 | 0.93 | 0.61 | 0.39 | 0.00 | 0.00 | 9.57  | 7.86 | 1.22 | 17.43 | 14.59 |
| FTA 2   | 8.43  | 0.46 | 0.33 | 1.37 | 9.19  | 0.00 | 0.00 | 0.00 | 0.00 | 0.00 | 0.00 | 0.00 | 0.00 | 0.00 | 0.00 | 0.00 | 9.52  | 1.37 | 6.95 | 10.89 | 8.43  |
| FTA 8   | 8.51  | 0.61 | 0.23 | 1.73 | 9.26  | 1.24 | 0.74 | 0.00 | 0.57 | 0.00 | 0.00 | 0.78 | 0.00 | 0.00 | 0.00 | 0.00 | 9.49  | 5.06 | 1.88 | 14.55 | 8.51  |
| CCN 12  | 9.39  | 0.97 | 0.00 | 1.82 | 9.47  | 1.38 | 0.75 | 0.43 | 0.63 | 0.00 | 0.71 | 0.91 | 0.56 | 0.00 | 0.00 | 0.00 | 9.47  | 7.19 | 1.32 | 16.66 | 9.39  |
| EET 13  | 11.02 | 1.18 | 0.25 | 1.78 | 9.13  | 1.34 | 0.76 | 0.00 | 0.60 | 0.00 | 0.00 | 0.90 | 0.50 | 0.41 | 0.00 | 0.00 | 9.38  | 6.29 | 1.49 | 15.67 | 12.20 |
| CCN 17  | 9.82  | 0.78 | 0.00 | 1.93 | 1.93  | 1.93 | 0.82 | 0.45 | 0.67 | 0.45 | 0.00 | 0.96 | 0.61 | 0.47 | 0.00 | 0.00 | 9.26  | 7.86 | 1.18 | 17.13 | 9.82  |
| FSV 4   | 9.15  | 1.18 | 0.24 | 1.61 | 9.01  | 1.11 | 0.63 | 0.00 | 0.49 | 0.00 | 0.00 | 0.77 | 0.53 | 0.00 | 0.00 | 0.00 | 9.25  | 5.14 | 1.80 | 14.39 | 10.33 |
| ICS-1 5 | 7.71  | 0.99 | 0.20 | 1.51 | 9.00  | 1.04 | 0.57 | 0.00 | 0.46 | 0.00 | 0.00 | 0.81 | 0.53 | 0.00 | 0.00 | 0.36 | 9.20  | 5.28 | 1.74 | 14.48 | 7.71  |
| FEC 8   | 10.45 | 0.71 | 0.28 | 1.72 | 8.62  | 1.37 | 0.80 | 0.44 | 0.65 | 0.00 | 0.00 | 0.86 | 0.47 | 0.00 | 0.00 | 0.00 | 8.90  | 6.31 | 1.41 | 15.21 | 10.45 |
| TSH 9   | 13.56 | 1.50 | 0.24 | 1.76 | 8.47  | 1.46 | 1.00 | 0.57 | 0.81 | 0.53 | 0.00 | 0.90 | 0.43 | 0.00 | 0.00 | 0.00 | 8.71  | 7.46 | 1.17 | 16.17 | 15.06 |
| FEC 15  | 8.15  | 0.61 | 0.18 | 1.51 | 8.48  | 1.04 | 0.60 | 0.35 | 0.47 | 0.00 | 0.00 | 0.75 | 0.40 | 0.00 | 0.00 | 0.00 | 8.66  | 5.12 | 1.69 | 13.78 | 8.15  |
| FSV 13  | 6.94  | 1.11 | 0.32 | 1.76 | 8.33  | 1.33 | 0.90 | 0.00 | 0.72 | 0.00 | 0.32 | 0.79 | 0.00 | 0.00 | 0.00 | 0.00 | 8.65  | 5.82 | 1.49 | 14.47 | 8.05  |
| FEAR 9  | 7.77  | 0.65 | 0.00 | 1.67 | 8.63  | 1.23 | 0.75 | 0.00 | 0.56 | 0.00 | 0.00 | 0.79 | 0.47 | 0.00 | 0.00 | 0.00 | 8.63  | 5.47 | 1.58 | 14.10 | 7.77  |
| CCN 14  | 9.15  | 0.63 | 0.00 | 1.79 | 8.60  | 1.41 | 0.82 | 0.44 | 0.66 | 0.00 | 0.00 | 0.90 | 0.59 | 0.45 | 0.00 | 0.00 | 8.60  | 7.06 | 1.22 | 15.66 | 9.15  |
| FTA 1   | 8.40  | 0.48 | 0.33 | 1.19 | 8.12  | 0.00 | 0.00 | 0.00 | 0.00 | 0.00 | 0.00 | 0.00 | 0.00 | 0.00 | 0.00 | 0.00 | 8.45  | 1.19 | 7.10 | 9.64  | 8.40  |
| FSV 7   | 7.80  | 1.00 | 0.00 | 1.59 | 8.30  | 1.17 | 0.69 | 0.00 | 0.52 | 0.00 | 0.00 | 0.81 | 0.00 | 0.00 | 0.00 | 0.00 | 8.30  | 4.78 | 1.74 | 13.08 | 7.80  |
| FEAR 13 | 9.57  | 1.50 | 0.22 | 1.78 | 8.07  | 1.55 | 1.09 | 0.57 | 0.86 | 0.56 | 0.00 | 0.89 | 0.00 | 0.00 | 0.00 | 0.00 | 8.29  | 7.30 | 1.14 | 15.59 | 11.07 |
| FEC 14  | 7.66  | 0.53 | 0.20 | 1.47 | 8.08  | 0.95 | 0.54 | 0.00 | 0.43 | 0.00 | 0.00 | 0.78 | 0.48 | 0.00 | 0.00 | 0.00 | 8.28  | 4.65 | 1.78 | 12.93 | 7.66  |
| FEAR 7  | 7.67  | 0.66 | 0.22 | 1.53 | 8.03  | 1.13 | 0.61 | 0.00 | 0.49 | 0.00 | 0.00 | 0.80 | 0.53 | 0.00 | 0.00 | 0.00 | 8.25  | 5.09 | 1.62 | 13.34 | 7.67  |
| FEC 6   | 8.93  | 0.74 | 0.00 | 1.41 | 8.21  | 0.91 | 0.47 | 0.00 | 0.45 | 0.00 | 0.00 | 0.82 | 0.58 | 0.44 | 0.00 | 0.46 | 8.21  | 5.54 | 1.48 | 13.75 | 8.93  |
| FTA 11  | 8.22  | 0.48 | 0.22 | 1.47 | 7.88  | 1.02 | 0.60 | 0.00 | 0.48 | 0.00 | 0.00 | 0.71 | 0.51 | 0.00 | 0.00 | 0.00 | 8.10  | 4.79 | 1.69 | 12.89 | 8.22  |
| ICS-1 3 | 6.63  | 1.21 | 0.00 | 1.62 | 8.09  | 0.00 | 0.00 | 0.00 | 0.00 | 0.00 | 0.00 | 0.00 | 0.00 | 0.00 | 0.00 | 0.00 | 8.09  | 1.62 | 4.99 | 9.71  | 7.84  |

|          |       |      |      |      |      |      |      |      |      |      |      |      |      |      |      |      |      |      |      |       |       |
|----------|-------|------|------|------|------|------|------|------|------|------|------|------|------|------|------|------|------|------|------|-------|-------|
| FTA 13   | 9.98  | 0.57 | 0.24 | 1.58 | 7.78 | 1.20 | 0.76 | 0.40 | 0.58 | 0.00 | 0.00 | 0.83 | 0.59 | 0.44 | 0.00 | 0.00 | 8.02 | 6.38 | 1.26 | 14.40 | 9.98  |
| FEC 2    | 9.24  | 0.70 | 0.22 | 1.58 | 7.67 | 1.17 | 0.68 | 0.00 | 0.55 | 0.00 | 0.00 | 0.76 | 0.46 | 0.00 | 0.00 | 0.00 | 7.89 | 5.20 | 1.52 | 13.09 | 9.24  |
| FTA 15   | 9.74  | 0.78 | 0.23 | 1.66 | 7.54 | 1.39 | 0.89 | 0.47 | 0.70 | 0.45 | 0.00 | 0.86 | 0.47 | 0.00 | 0.00 | 0.00 | 7.77 | 6.89 | 1.13 | 14.66 | 9.74  |
| FEC 7    | 8.39  | 0.75 | 0.00 | 1.43 | 7.70 | 1.08 | 0.63 | 0.00 | 0.48 | 0.00 | 0.00 | 0.72 | 0.51 | 0.43 | 0.00 | 0.00 | 7.70 | 5.28 | 1.46 | 12.98 | 8.39  |
| ICS-1 12 | 10.05 | 1.64 | 0.00 | 1.70 | 7.70 | 1.54 | 1.12 | 0.60 | 0.94 | 0.56 | 0.00 | 0.91 | 0.00 | 0.00 | 0.00 | 0.00 | 7.70 | 7.37 | 1.04 | 15.07 | 11.69 |
| FSV 6    | 9.24  | 1.51 | 0.00 | 1.38 | 7.44 | 1.06 | 0.63 | 0.00 | 0.46 | 0.00 | 0.00 | 0.70 | 0.00 | 0.00 | 0.00 | 0.00 | 7.44 | 4.23 | 1.76 | 11.67 | 10.75 |
| ICS-1 9  | 6.60  | 1.11 | 0.00 | 1.58 | 7.36 | 1.32 | 0.90 | 0.49 | 0.69 | 0.43 | 0.00 | 0.75 | 0.00 | 0.00 | 0.00 | 0.00 | 7.36 | 6.16 | 1.19 | 13.52 | 7.70  |
| ICS-1 11 | 9.57  | 1.48 | 0.00 | 1.62 | 7.35 | 1.46 | 1.07 | 0.58 | 0.89 | 0.54 | 0.00 | 0.88 | 0.00 | 0.00 | 0.00 | 0.00 | 7.35 | 7.04 | 1.04 | 14.39 | 11.04 |
| FEAR 8   | 7.51  | 0.68 | 0.00 | 1.36 | 7.31 | 0.91 | 0.50 | 0.00 | 0.43 | 0.00 | 0.00 | 0.78 | 0.53 | 0.00 | 0.00 | 0.00 | 7.31 | 4.51 | 1.62 | 11.82 | 7.51  |
| ICS 60 7 | 10.65 | 2.14 | 0.00 | 1.49 | 7.26 | 1.31 | 0.90 | 0.51 | 0.75 | 0.49 | 0.00 | 0.80 | 0.45 | 0.00 | 0.00 | 0.00 | 7.26 | 6.70 | 1.08 | 13.96 | 12.79 |
| ICS 60 8 | 10.65 | 2.14 | 0.00 | 1.49 | 7.26 | 1.31 | 0.90 | 0.51 | 0.75 | 0.49 | 0.00 | 0.80 | 0.45 | 0.00 | 0.00 | 0.00 | 7.26 | 6.70 | 1.08 | 13.96 | 12.79 |
| FEC 5    | 8.41  | 0.55 | 0.00 | 1.37 | 7.24 | 0.99 | 0.60 | 0.00 | 0.48 | 0.00 | 0.00 | 0.77 | 0.47 | 0.00 | 0.00 | 0.00 | 7.24 | 4.68 | 1.55 | 11.92 | 8.41  |
| FSV 5    | 8.36  | 1.11 | 0.17 | 1.23 | 6.92 | 0.87 | 0.49 | 0.00 | 0.37 | 0.00 | 0.00 | 0.67 | 0.40 | 0.00 | 0.00 | 0.00 | 7.09 | 4.03 | 1.76 | 11.12 | 9.47  |
| ICS-95 6 | 8.84  | 1.24 | 0.18 | 1.71 | 6.80 | 1.49 | 1.08 | 0.00 | 0.89 | 0.00 | 0.00 | 0.89 | 0.00 | 0.00 | 0.00 | 0.00 | 6.98 | 6.06 | 1.15 | 13.04 | 10.08 |
| FEC 9    | 8.99  | 0.76 | 0.00 | 1.39 | 6.78 | 1.12 | 0.71 | 0.00 | 0.59 | 0.00 | 0.00 | 0.74 | 0.44 | 0.00 | 0.00 | 0.00 | 6.78 | 4.99 | 1.36 | 11.77 | 8.99  |
| FEAR 5   | 7.53  | 1.01 | 0.00 | 1.11 | 6.75 | 0.74 | 0.00 | 0.00 | 0.00 | 0.00 | 0.00 | 0.74 | 0.53 | 0.16 | 0.00 | 0.00 | 6.75 | 3.28 | 2.06 | 10.03 | 8.54  |
| FSV 10   | 7.38  | 1.13 | 0.00 | 1.26 | 6.70 | 0.93 | 0.53 | 0.00 | 0.41 | 0.00 | 0.00 | 0.70 | 0.43 | 0.00 | 0.00 | 0.00 | 6.70 | 4.26 | 1.57 | 10.96 | 8.51  |
| FEC 10   | 11.07 | 1.20 | 0.20 | 1.56 | 6.23 | 0.00 | 1.10 | 0.00 | 0.95 | 0.61 | 0.00 | 0.86 | 0.00 | 0.00 | 0.00 | 0.00 | 6.43 | 5.08 | 1.27 | 11.51 | 12.27 |
| FTA16    | 9.34  | 0.63 | 0.00 | 1.49 | 6.43 | 1.27 | 0.80 | 0.43 | 0.66 | 0.00 | 0.00 | 0.78 | 0.44 | 0.00 | 0.00 | 0.00 | 6.43 | 5.87 | 1.10 | 12.30 | 9.34  |
| FTA 17   | 11.37 | 1.71 | 0.21 | 1.40 | 6.22 | 1.24 | 0.85 | 0.47 | 0.73 | 0.48 | 0.00 | 0.76 | 0.00 | 0.00 | 0.00 | 0.00 | 6.43 | 5.93 | 1.08 | 12.36 | 13.08 |
| FTA 14   | 8.97  | 0.53 | 0.00 | 1.40 | 6.25 | 1.15 | 0.74 | 0.42 | 0.59 | 0.00 | 0.00 | 0.72 | 0.00 | 0.00 | 0.00 | 0.00 | 6.25 | 5.02 | 1.25 | 11.27 | 8.97  |
| ICS-95 8 | 11.37 | 1.77 | 0.00 | 1.62 | 6.24 | 1.54 | 1.10 | 0.58 | 0.89 | 0.55 | 0.00 | 0.79 | 0.00 | 0.00 | 0.00 | 0.00 | 6.24 | 7.07 | 0.88 | 13.31 | 13.13 |
| FEC 11   | 11.01 | 1.30 | 0.20 | 1.53 | 6.00 | 0.00 | 1.10 | 0.00 | 0.95 | 0.62 | 0.00 | 0.86 | 0.00 | 0.00 | 0.00 | 0.00 | 6.20 | 5.06 | 1.23 | 11.26 | 12.30 |
| FEAR 10  | 7.25  | 0.54 | 0.00 | 1.12 | 6.11 | 0.87 | 0.54 | 0.00 | 0.39 | 0.00 | 0.00 | 0.69 | 0.48 | 0.00 | 0.00 | 0.00 | 6.11 | 4.09 | 1.49 | 10.20 | 7.25  |
| CCN 15   | 9.24  | 1.23 | 0.00 | 1.52 | 6.05 | 1.36 | 0.89 | 0.51 | 0.72 | 0.42 | 0.00 | 0.79 | 0.42 | 0.00 | 0.00 | 0.00 | 6.05 | 6.63 | 0.91 | 12.68 | 10.46 |
| FSV 8    | 5.82  | 0.87 | 0.00 | 1.15 | 5.92 | 0.84 | 0.49 | 0.00 | 0.00 | 0.00 | 0.43 | 0.61 | 0.00 | 0.00 | 0.00 | 0.00 | 5.92 | 3.52 | 1.68 | 9.44  | 5.82  |
| EET 15   | 9.57  | 1.50 | 0.24 | 1.24 | 5.53 | 1.05 | 0.73 | 0.42 | 0.61 | 0.00 | 0.00 | 0.62 | 0.00 | 0.00 | 0.00 | 0.00 | 5.77 | 4.67 | 1.24 | 10.44 | 11.07 |
| ICS-95 3 | 11.87 | 1.66 | 0.00 | 1.28 | 5.63 | 1.13 | 0.77 | 0.00 | 0.63 | 0.00 | 0.00 | 0.65 | 0.00 | 0.00 | 0.00 | 0.00 | 5.63 | 4.46 | 1.26 | 10.09 | 13.53 |
| TSH 11   | 12.57 | 1.94 | 0.00 | 1.45 | 5.58 | 1.35 | 0.96 | 0.53 | 0.80 | 0.51 | 0.00 | 0.77 | 0.00 | 0.00 | 0.00 | 0.00 | 5.58 | 6.37 | 0.88 | 11.95 | 14.51 |
| ICS-95 7 | 9.01  | 1.20 | 0.15 | 1.53 | 5.43 | 1.43 | 1.07 | 0.00 | 0.81 | 0.00 | 0.00 | 0.86 | 0.00 | 0.00 | 0.00 | 0.00 | 5.58 | 5.70 | 0.98 | 11.28 | 10.21 |
| TSH 10   | 9.57  | 1.50 | 0.00 | 1.30 | 5.36 | 1.18 | 0.86 | 0.48 | 0.69 | 0.47 | 0.00 | 0.71 | 0.00 | 0.00 | 0.00 | 0.00 | 5.36 | 5.69 | 0.94 | 11.05 | 11.07 |
| FEAR 12  | 7.67  | 0.54 | 0.00 | 1.18 | 5.20 | 1.00 | 0.68 | 0.00 | 0.54 | 0.00 | 0.00 | 0.63 | 0.00 | 0.00 | 0.00 | 0.00 | 5.20 | 4.03 | 1.29 | 9.23  | 7.67  |
| FSV 11   | 6.10  | 0.95 | 0.00 | 1.08 | 5.01 | 0.79 | 0.50 | 0.00 | 0.39 | 0.00 | 0.00 | 0.51 | 0.00 | 0.00 | 0.00 | 0.00 | 5.01 | 3.27 | 1.53 | 8.28  | 6.10  |

|           |       |      |      |      |      |      |      |      |      |      |      |      |      |      |      |      |      |      |      |       |       |
|-----------|-------|------|------|------|------|------|------|------|------|------|------|------|------|------|------|------|------|------|------|-------|-------|
| ICS-1 13  | 8.35  | 1.36 | 0.00 | 1.19 | 4.87 | 1.10 | 0.75 | 0.42 | 0.61 | 0.00 | 0.00 | 0.65 | 0.00 | 0.00 | 0.00 | 0.00 | 4.87 | 4.72 | 1.03 | 9.59  | 9.71  |
| FEC 12    | 13.59 | 1.22 | 0.00 | 1.28 | 4.83 | 1.20 | 0.83 | 0.46 | 0.71 | 0.44 | 0.00 | 0.72 | 0.00 | 0.00 | 0.00 | 0.00 | 4.83 | 5.64 | 0.86 | 10.47 | 14.81 |
| FTA 12    | 9.29  | 1.45 | 0.00 | 0.98 | 4.56 | 0.85 | 0.56 | 0.00 | 0.48 | 0.00 | 0.00 | 0.56 | 0.00 | 0.00 | 0.00 | 0.00 | 4.56 | 3.43 | 1.33 | 7.99  | 10.75 |
| TSH 12    | 9.57  | 1.50 | 0.00 | 1.14 | 4.51 | 1.08 | 0.82 | 0.46 | 0.67 | 0.47 | 0.00 | 0.66 | 0.00 | 0.00 | 0.00 | 0.00 | 4.51 | 5.30 | 0.85 | 9.81  | 11.07 |
| FEAR 14   | 9.57  | 1.50 | 0.00 | 1.18 | 4.42 | 1.17 | 0.88 | 0.49 | 0.70 | 0.49 | 0.00 | 0.68 | 0.00 | 0.00 | 0.00 | 0.00 | 4.42 | 5.59 | 0.79 | 10.01 | 11.07 |
| ICS-95 9  | 10.02 | 2.06 | 0.00 | 1.21 | 4.41 | 1.15 | 0.77 | 0.43 | 0.61 | 0.00 | 0.00 | 0.67 | 0.41 | 0.00 | 0.00 | 0.00 | 4.41 | 5.25 | 0.84 | 9.66  | 12.08 |
| CCN 16    | 9.65  | 0.62 | 0.00 | 1.07 | 3.85 | 1.04 | 0.76 | 0.42 | 0.64 | 0.00 | 0.00 | 0.60 | 0.00 | 0.00 | 0.00 | 0.00 | 3.85 | 4.53 | 0.85 | 8.38  | 9.65  |
| FSV 12    | 5.69  | 1.03 | 0.00 | 0.87 | 3.80 | 0.71 | 0.46 | 0.00 | 0.00 | 0.00 | 0.00 | 0.48 | 0.00 | 0.00 | 0.00 | 0.00 | 3.80 | 2.52 | 1.51 | 6.32  | 6.71  |
| ICS-95 10 | 13.72 | 1.99 | 0.00 | 1.16 | 3.52 | 1.31 | 0.96 | 0.51 | 0.83 | 0.51 | 0.00 | 0.66 | 0.00 | 0.00 | 0.00 | 0.00 | 3.52 | 5.94 | 0.59 | 9.46  | 15.70 |
| FTA 5     | 7.89  | 0.51 | 0.39 | 0.78 | 2.41 | 0.82 | 0.60 | 0.00 | 0.51 | 0.00 | 0.00 | 0.49 | 0.00 | 0.00 | 0.00 | 0.00 | 2.80 | 3.20 | 0.88 | 6.00  | 7.89  |
| ICS-95 11 | 10.74 | 1.52 | 0.00 | 0.95 | 2.53 | 1.09 | 0.81 | 0.47 | 0.68 | 0.44 | 0.00 | 0.56 | 0.00 | 0.00 | 0.00 | 0.00 | 2.53 | 5.00 | 0.51 | 7.53  | 12.26 |
| FEC 13    | 13.27 | 1.10 | 0.00 | 0.82 | 2.34 | 0.91 | 0.75 | 0.45 | 0.70 | 0.48 | 0.00 | 0.57 | 0.00 | 0.00 | 0.00 | 0.00 | 2.34 | 4.68 | 0.50 | 7.02  | 14.37 |
| CCN 4     | 10.81 | 1.08 | 0.36 | 0.61 | 1.42 | 0.77 | 0.68 | 0.43 | 0.65 | 0.42 | 0.00 | 0.50 | 0.00 | 0.00 | 0.00 | 0.00 | 1.78 | 4.06 | 0.44 | 5.84  | 11.89 |
| FTA 18    | 9.33  | 0.51 | 0.00 | 0.00 | 1.68 | 0.64 | 0.49 | 0.00 | 0.45 | 0.00 | 0.00 | 0.00 | 0.00 | 0.00 | 0.00 | 0.00 | 1.68 | 1.58 | 1.06 | 3.26  | 9.33  |
| FTA 19    | 8.12  | 0.51 | 0.00 | 0.65 | 1.59 | 0.75 | 0.00 | 0.00 | 0.51 | 0.00 | 0.00 | 0.43 | 0.00 | 0.00 | 0.00 | 0.00 | 1.59 | 2.34 | 0.68 | 3.93  | 8.12  |
| ICS-1 10  | 6.45  | 1.26 | 0.00 | 0.00 | 1.07 | 0.49 | 0.43 | 0.00 | 0.00 | 0.00 | 0.00 | 0.00 | 0.00 | 0.00 | 0.00 | 0.00 | 1.07 | 0.92 | 1.16 | 1.99  | 7.71  |
| ICS-1 14  | 6.79  | 1.39 | 0.00 | 0.00 | 1.02 | 0.49 | 0.43 | 0.00 | 0.00 | 6.79 | 0.00 | 0.00 | 0.00 | 0.00 | 0.00 | 0.00 | 1.02 | 7.71 | 0.13 | 8.73  | 8.17  |

**TM:** total monomers; **TP:** total procyanidins; **MX:** total methylxanthines; **TM/TP:** monomer/procyanidin ratio; **CT:** catechin; **EP:** epicatechin; **PB2:** procyanidin B2; **CF:** caffeine; **TB:** theobromine; **D1-11:** unknown procyanidins 1-11; **TF:** total flavonoids.
